# Supplementary material for: Unravelling the Impact of the Genetic Variant rs1042058 within the TPL2 Risk Gene Locus on Molecular and Clinical Disease Course Patients with Inflammatory Bowel Disease
Source: MDPI journal article supplement (doi:10.3390/cells10123589), 2021-12-20
Supplement: s1 [file s1]

A)

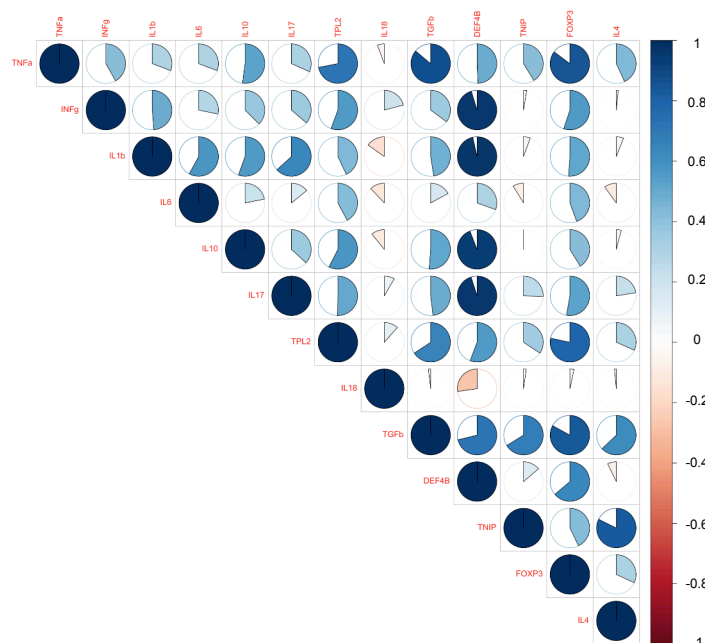

B)

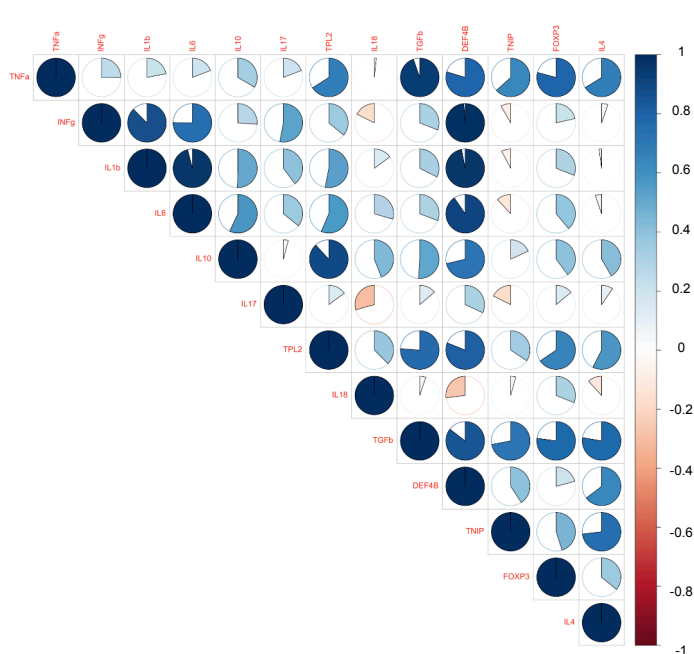

C)

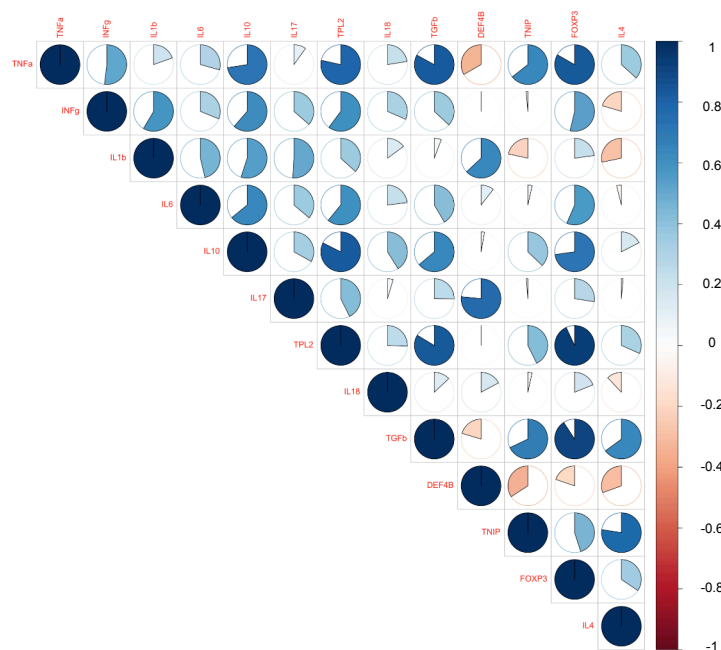

D)

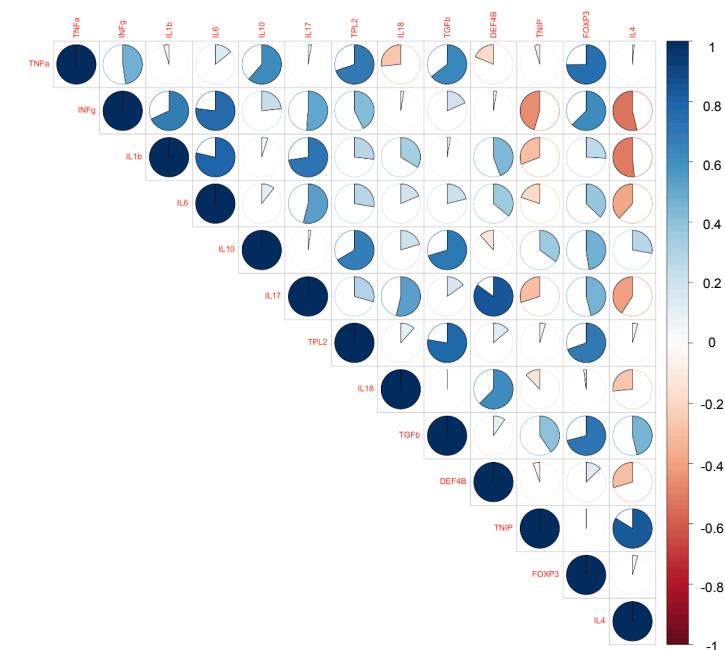

**Supplementary Figure S1. Correlation analysis of TPL2 variant expression with mRNA cytokines expression from both CD and UC patients.**

Correlation analysis between TPL2 and cytokines in both CD with variant rs1042058 (A) and CD wild type (B), in addition to UC with variant (C) and wild type (D), blue color indicate positive correlation and red color represents negative regulation.

## Supplementary Table S1.

Clinical and phenotypical characteristics of Swiss IBD cohort patients with CD and UC with (GG) or without (AA) rs1042058 TPL2 variant in numbers

| Clinical characteristics of patients |                                                        | CD |    | UC |    |
|--------------------------------------|--------------------------------------------------------|----|----|----|----|
|                                      |                                                        | GG | AA | GG | AA |
| Number of patients for analysis      | Number of biopsies for protein analysis                | 10 | 9  | 14 | 12 |
|                                      | Number of biopsies for mRNA analysis                   | 32 | 20 | 28 | 19 |
|                                      | Number of blood samples cytokine analysis              | 39 | 37 | 37 | 42 |
| Disease activity index               | Patients in complete remission (CDAI < 150, MTWAI < 3) | 50 | 48 | 31 | 30 |
|                                      | Patients with active disease (CDAI > 150, MTWAI > 3)   | 5  | 4  | 20 | 25 |
| Genetic Background                   | Patients with or without rs1042058 TPL2 variant        | 55 | 52 | 51 | 55 |
| Montreal classification              | B1                                                     | 31 | 33 | 50 | 53 |
|                                      | B2                                                     | 15 | 8  | 0  | 1  |
|                                      | B3                                                     | 9  | 10 | 1  | 1  |
|                                      | "p" perianal disease                                   | 12 | 10 | 2  | 0  |
|                                      | NA                                                     | 0  | 1  | 0  | 0  |
| Intestinal surgery                   | patients with intestinal surgery                       | 22 | 20 | 10 | 6  |
| Immunosuppressive                    | Patients with immunosuppressive treatment successful   | 32 | 30 | 29 | 31 |
|                                      | Patients with immunosuppressive treatment failure      | 40 | 28 | 38 | 33 |
| Steroids                             | Patients with steroids treatment successful            | 51 | 65 | 57 | 46 |
|                                      | Patients with steroids treatment failure               | 14 | 13 | 13 | 10 |
| Stenosis                             |                                                        | 38 | 27 | 3  | 3  |
| Fistula                              |                                                        | 58 | 54 | 6  | 8  |
| Extraintestinal manifestations       |                                                        | 60 | 52 | 41 | 39 |

## Supplementary Table S2.

Clinical characteristics of CD patients according to presence of TPL2 risk alleles.

| Number (%)                    | AA         | AG or GG   | p-value (chi2) |
|-------------------------------|------------|------------|----------------|
| Initial disease location      |            |            |                |
| L1                            | 44 (20.9)  | 206 (20.9) | 0.517          |
| L2                            | 32 (15.2)  | 166 (16.8) |                |
| L3                            | 89 (42.4)  | 417 (42.3) |                |
| L4                            | 3 (1.4)    | 8 (0.8)    |                |
| L1 + L4                       | 0          | 17 (1.7)   |                |
| L2 + L4                       | 4 (1.9)    | 10 (1)     |                |
| L3 + L4                       | 15 (7.1)   | 70 (7.1)   |                |
| Unknown                       | 23 (10.9)  | 93 (9.4)   |                |
| Current disease location      |            |            |                |
| L1                            | 54 (25.7)  | 265 (26.8) | 0.499          |
| L2                            | 65 (30.9)  | 301 (30.5) |                |
| L3                            | 57 (27.1)  | 286 (29)   |                |
| L4                            | 6 (2.8)    | 29 (2.9)   |                |
| L1 + L4                       | 3 (1.4)    | 21 (2.1)   |                |
| L2 + L4                       | 8 (3.8)    | 14 (1.4)   |                |
| L3 + L4                       | 12 (5.7)   | 52 (5.3)   |                |
| Unknown                       | 5 (2.4)    | 19 (1.9)   |                |
| Perianal fistula              |            |            |                |
| Yes                           | 14 (6.7)   | 54 (5.5)   | 0.497          |
| No                            | 196 (93.3) | 933 (94.5) |                |
| Other fistula                 |            |            |                |
| Yes                           | 8 (3.8)    | 32 (3.2)   | 0.678          |
| No                            | 202 (96.2) | 955 (96.8) |                |
| Anal fissure                  |            |            |                |
| Yes                           | 6 (2.9)    | 24 (2.4)   | 0.720          |
| No                            | 204 (97.1) | 963 (95.6) |                |
| Abscess                       |            |            |                |
| Yes                           | 6 (2.9)    | 47 (4.8)   | 0.223          |
| No                            | 204 (97.1) | 940 (95.2) |                |
| Summary of History of fistula |            |            |                |
| Yes                           | 31 (14.8)  | 118 (12)   | 0.263          |
| No                            | 179 (85.2) | 869 (88)   |                |
| Stenosis                      |            |            |                |
| Yes                           | 25 (11.9)  | 112 (11.4) | 0.818          |
| No                            | 185 (88.1) | 875 (88.6) |                |
| Intestinal Surgery            |            |            |                |
| Yes                           | 7 (3.3)    | 35 (3.5)   | 0.879          |
| No                            | 203 (96.7) | 952 (96.5) |                |

## Supplementary Table S2. continuation

Clinical characteristics of CD patients according to presence of TPL2 risk alleles.

| Number (%)                                               | AA         | AG or GG   | p-value (chi2) |
|----------------------------------------------------------|------------|------------|----------------|
| <b>Osteopenia (–porosis)</b>                             |            |            |                |
| Yes                                                      | 9 (4.3)    | 63 (6.4)   | 0.246          |
| No                                                       | 201 (95.7) | 924 (93.6) |                |
| <b>Deep Venous Thrombosis</b>                            |            |            |                |
| Yes                                                      | 0          | 0          | 0.514          |
| No                                                       | 210 (100)  | 987 (100)  |                |
| <b>Pulmonary Embolism</b>                                |            |            |                |
| Yes                                                      | 0          | 2 (0.2)    | 0.695          |
| No                                                       | 210 (100)  | 985 (99.8) |                |
| <b>Gallstone</b>                                         |            |            |                |
| Yes                                                      | 1 (0.5)    | 3 (0.3)    | 0.955          |
| No                                                       | 209 (99.5) | 984 (99.7) |                |
| <b>Nephrolithiasis</b>                                   |            |            |                |
| Yes                                                      | 1 (0.5)    | 5 (0.5)    | 0.936          |
| No                                                       | 209 (99.5) | 982 (99.5) |                |
| <b>Malabsorption syndrome</b>                            |            |            |                |
| Yes                                                      | 2 (0.9)    | 10 (1)     | 0.885          |
| No                                                       | 208 (99.1) | 977 (99)   |                |
| <b>Perforation / Peritonitis</b>                         |            |            |                |
| Yes                                                      | 1 (0.5)    | 4 (0.4)    | 0.257          |
| No                                                       | 209 (99.5) | 983 (99.6) |                |
| <b>Adv. Effect of Treatment</b>                          |            |            |                |
| Yes                                                      | 0          | 6 (0.6)    | 0.118          |
| No                                                       | 210 (100)  | 981 (99.4) |                |
| <b>Summary of Complications</b>                          |            |            |                |
| Yes                                                      | 12 (5.7)   | 89 (9)     | 0.441          |
| No                                                       | 198 (94.3) | 898 (91)   |                |
| <b>Use of Anti-TNF</b>                                   |            |            |                |
| Yes                                                      | 107 (51)   | 474 (48)   | 0.469          |
| No                                                       | 103 (49)   | 513 (52)   |                |
| <b>Failure or non-response to Anti-TNF therapy</b>       |            |            |                |
| Yes                                                      | 21 (55.3)  | 75 (48.7)  | 0.535          |
| No                                                       | 17 (44.7)  | 79 (51.3)  |                |
| <b>Use of Steroids</b>                                   |            |            |                |
| Yes                                                      | 71 (33.8)  | 312 (31.6) | 0.846          |
| No                                                       | 139 (66.2) | 675 (68.4) |                |
| <b>Non-response to steroids</b>                          |            |            |                |
| Yes                                                      | 17 (38.6)  | 60 (37)    | 0.679          |
| No                                                       | 27 (61.4)  | 102 (63)   |                |
| <b>Number of follow-ups with a therapy with steroids</b> |            |            |                |
| 0                                                        | 26 (12.4)  | 131 (13.3) | 0.679          |
| 1                                                        | 67 (31.9)  | 302 (30.6) |                |
| 2                                                        | 37 (17.6)  | 188 (19)   |                |
| 3                                                        | 30 (14.3)  | 118 (12)   |                |
| 4                                                        | 16 (7.6)   | 82 (8.3)   |                |
| 5                                                        | 9 (4.3)    | 49 (5)     |                |
| 6                                                        | 7 (3.3)    | 39 (4)     |                |
| 7                                                        | 3 (1.4)    | 21 (2.1)   |                |
| 8                                                        | 5 (2.4)    | 19 (1.9)   |                |
| 9                                                        | 4 (1.9)    | 17 (1.7)   |                |
| 10                                                       | 0          | 12 (1.2)   |                |
| 11                                                       | 3 (1.4)    | 5 (0.5)    |                |
| 12                                                       | 2 (0.9)    | 3 (0.3)    |                |
| 13                                                       | 1 (0.5)    | 1 (0.1)    |                |

## Supplementary Table S2. continuation

Clinical characteristics of CD patients according to presence of TPL2 risk alleles.

| Number (%)                 | AA         | AG or GG   | p-value (chi2) |
|----------------------------|------------|------------|----------------|
| Use of Azathioprine        |            |            |                |
| Yes                        | 48 (22.9)  | 238 (24.1) | 0.981          |
| No                         | 162 (77.1) | 749 (75.9) |                |
| Use of 6-Mercaptopurine    |            |            |                |
| Yes                        | 5 (2.4)    | 29 (2.9)   | 0.659          |
| No                         | 205 (97.6) | 958 (97.1) |                |
| Use of Antibiotics         |            |            |                |
| Yes                        | 13 (6.2)   | 90 (9.1)   | 0.169          |
| No                         | 197 (93.8) | 897 (90.9) |                |
| Use of Methotrexate        |            |            |                |
| Yes                        | 18 (8.6)   | 95 (9.6)   | 0.635          |
| No                         | 192 (91.4) | 892 (90.4) |                |
| Use of Cyclosporine        |            |            |                |
| Yes                        | 0          | 1 (0.1)    | 0.644          |
| No                         | 210 (100)  | 986 (99.9) |                |
| Use of Tacrolimus          |            |            |                |
| Yes                        | 1 (0.5)    | 0          | 0.175          |
| No                         | 209 (99.5) | 987 (100)  |                |
| Summary of these therapies |            |            |                |
| Yes                        | 19 (9)     | 96 (9.7)   | 0.762          |
| No                         | 191 (91)   | 891 (90.3) |                |

## Supplementary Table S3.

Clinical characteristics of UC patients according to presence of TPL2 risk alleles.

| Number (%)                | AA         | AG or GG   | p-value (chi <sup>2</sup> ) |
|---------------------------|------------|------------|-----------------------------|
| Initial disease location  |            |            |                             |
| Pancolitis                | 78 (45)    | 335 (43.2) | 0.975                       |
| Left-sided Colitis        | 50 (28.9)  | 233 (30.1) |                             |
| Proctitis                 | 25 (14.4)  | 117 (15.1) |                             |
| Unknown                   | 20 (11.6)  | 90 (11.6)  |                             |
| Current disease location  |            |            |                             |
| Pancolitis                | 80 (46.2)  | 354 (45.7) | 0.734                       |
| Left-sided Colitis        | 55 (31.8)  | 270 (34.8) |                             |
| Proctitis                 | 34 (19.6)  | 129 (16.6) |                             |
| Unknown                   | 4 (2.3)    | 22 (2.8)   |                             |
| Osteopenia (–porosis)     |            |            |                             |
| Yes                       | 14 (8.1)   | 39 (5)     | 0.113                       |
| No                        | 159 (91.9) | 736 (95)   |                             |
| Deep Venous Thrombosis    |            |            |                             |
| Yes                       | 2 (1.2)    | 0          | 0.033                       |
| No                        | 171 (98.8) | 775 (100)  |                             |
| Pulmonary Embolism        |            |            |                             |
| Yes                       | 1 (0.6)    | 1 (0.1)    | 0.245                       |
| No                        | 172 (99.4) | 774 (99.9) |                             |
| Gallstone                 |            |            |                             |
| Yes                       | 0          | 4 (0.5)    | 0.344                       |
| No                        | 173 (100)  | 771 (99.5) |                             |
| Nephrolithiasis           |            |            |                             |
| Yes                       | 1 (0.6)    | 3 (0.4)    | 0.726                       |
| No                        | 172 (99.4) | 772 (99.6) |                             |
| Malabsorption syndrome    |            |            |                             |
| Yes                       | 3 (1.7)    | 3 (0.4)    | 0.078                       |
| No                        | 170 (98.3) | 772 (99.6) |                             |
| Perforation / Peritonitis |            |            |                             |
| Yes                       | 0          | 0          |                             |
| No                        | 173 (100)  | 775 (100)  |                             |
| Adv. Effect of Treatment  |            |            |                             |
| Yes                       | 1 (0.6)    | 4 (0.5)    | 0.919                       |
| No                        | 172 (99.4) | 771 (99.5) |                             |
| Summary of Complications  |            |            |                             |
| Yes                       | 19 (11)    | 52 (6.7)   | 0.054                       |
| No                        | 154 (89)   | 723 (93.3) |                             |
| Peripheral arthritis      |            |            |                             |
| Yes                       | 19 (11)    | 86 (11.1)  | 0.966                       |
| No                        | 154 (89)   | 689 (88.9) |                             |
| Uveitis / Iritis          |            |            |                             |
| Yes                       | 1 (0.6)    | 3 (0.4)    | 0.726                       |
| No                        | 172 (99.4) | 772 (99.6) |                             |
| Pyoderma gangrenosum      |            |            |                             |
| Yes                       | 1 (0.6)    | 0          | 0.182                       |
| No                        | 172 (99.4) | 775 (100)  |                             |
| Erythema nodosum          |            |            |                             |
| Yes                       | 0          | 4 (0.5)    | 0.446                       |
| No                        | 173 (100)  | 771 (99.5) |                             |

## Supplementary Table S3. continuation

Clinical characteristics of UC patients according to presence of TPL2 risk alleles.

| Number (%)                                         | AA         | AG or GG   | p-value (chi <sup>2</sup> ) |
|----------------------------------------------------|------------|------------|-----------------------------|
| <b>Aphthous oral ulcers</b>                        |            |            |                             |
| Yes                                                | 1 (0.6)    | 17 (2.2)   | 0.223                       |
| No                                                 | 172 (99.4) | 758 (97.8) |                             |
| <b>Ankylosing spondylitis</b>                      |            |            |                             |
| Yes                                                | 3 (1.7)    | 7 (0.9)    | 0.333                       |
| No                                                 | 170 (98.3) | 768 (99.1) |                             |
| <b>Prim. scler. cholangitis</b>                    |            |            |                             |
| Yes                                                | 1 (0.6)    | 17 (2.2)   | 0.159                       |
| No                                                 | 172 (99.4) | 758 (97.8) |                             |
| <b>Other</b>                                       |            |            |                             |
| Yes                                                | 2 (1.2)    | 8 (1)      | 0.885                       |
| No                                                 | 171 (98.8) | 767 (99)   |                             |
| <b>Summary of Extraintestinal manifestations</b>   |            |            |                             |
| Yes                                                | 24 (13.9)  | 127 (16.4) | 0.414                       |
| No                                                 | 149 (86.1) | 648 (83.6) |                             |
| <b>Use of Anti-TNF</b>                             |            |            |                             |
| Yes                                                | 46 (26.6)  | 190 (24.5) | 0.568                       |
| No                                                 | 127 (73.4) | 585 (75.5) |                             |
| <b>Failure or non-response to Anti-TNF therapy</b> |            |            |                             |
| Yes                                                | 11 (45.8)  | 44 (55)    | 0.430                       |
| No                                                 | 13 (54.2)  | 36 (45)    |                             |
| <b>Use of Steroids</b>                             |            |            |                             |
| Yes                                                | 62 (35.8)  | 248 (32)   | 0.331                       |
| No                                                 | 111 (64.2) | 527 (68)   |                             |
| <b>Non-response to steroids</b>                    |            |            |                             |
| Yes                                                | 13 (35.1)  | 44 (34.1)  | 0.908                       |
| No                                                 | 24 (64.9)  | 85 (65.9)  |                             |
| <b>Use of Azathioprine</b>                         |            |            |                             |
| Yes                                                | 41 (23.7)  | 181 (23.4) | 0.923                       |
| No                                                 | 132 (76.3) | 594 (76.6) |                             |
| <b>Use of 6-Mercaptopurine</b>                     |            |            |                             |
| Yes                                                | 7 (4)      | 25 (3.2)   | 0.589                       |
| No                                                 | 166 (96)   | 750 (96.8) |                             |
| <b>Use of Antibiotics</b>                          |            |            |                             |
| Yes                                                | 10 (5.8)   | 54 (7)     | 0.574                       |
| No                                                 | 163 (94.2) | 721 (93)   |                             |
| <b>Use of Methotrexate</b>                         |            |            |                             |
| Yes                                                | 8 (4.6)    | 40 (5.2)   | 0.771                       |
| No                                                 | 165 (95.4) | 735 (94.8) |                             |
| <b>Use of Cyclosporine</b>                         |            |            |                             |
| Yes                                                | 1 (0.6)    | 5 (0.7)    | 0.920                       |
| No                                                 | 172 (99.4) | 770 (99.3) |                             |
| <b>Use of Tacrolimus</b>                           |            |            |                             |
| Yes                                                | 3 (1.7)    | 16 (2.1)   | 0.779                       |
| No                                                 | 170 (98.3) | 759 (97.9) |                             |
| <b>Summary of these therapies</b>                  |            |            |                             |
| Yes                                                | 12 (7)     | 60 (7.7)   | 0.718                       |
| No                                                 | 161 (93)   | 715 (92.3) |                             |
